# Supplementary material for: Phosphorylation modifies the molecular stability of β-amyloid deposits
Source: PubMed Central journal article supplement (PMC4833870; doi:10.1038/ncomms11359), 2016-04-13
Supplement: ncomms11359-s1.pdf [file ncomms11359-s1.pdf]

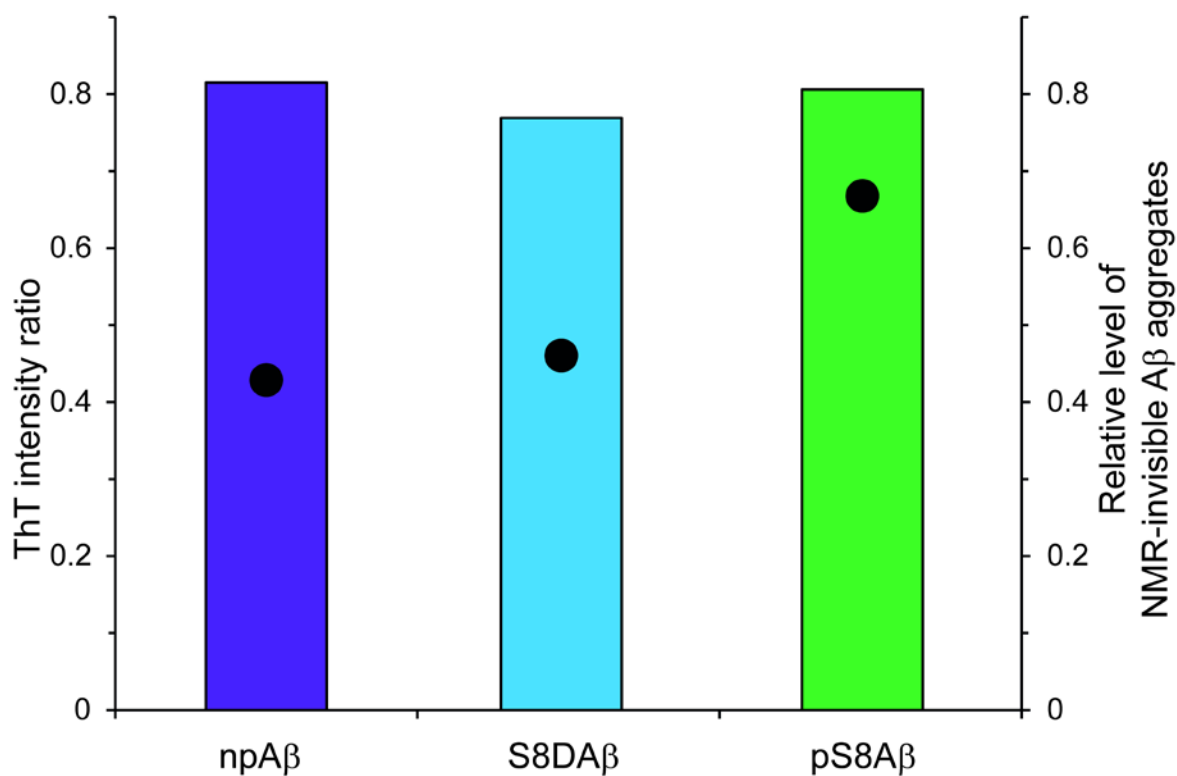

**Supplementary Figure 1.** Application of high pressure (2000 bar, 18 hours) to aggregated npAβ, pS8Aβ and S8DAβ reduced their ThT fluorescence intensity to ~ 80% of the initial levels before pressure application. The drop in ThT intensity is less prominent than the pressure-induced decrease in the NMR-invisible Aβ aggregates (second axis, represented by solid circles).

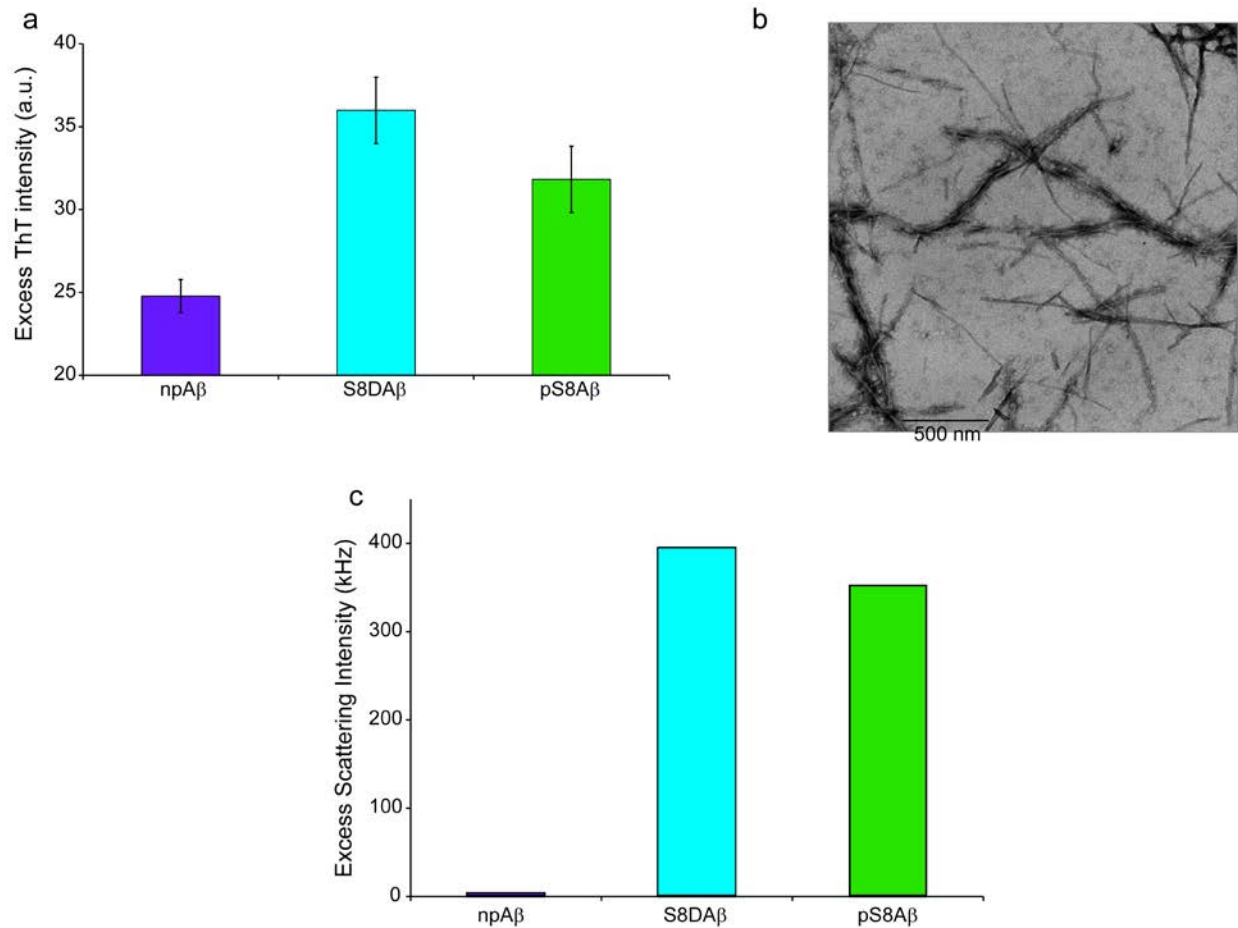

**Supplementary Figure 2.** Mutation of serine 8 to aspartate mimics the higher propensity of S8-phosphorylated A $\beta$  for fibrillar and oligomeric aggregation. **(a)** Thioflavin T (ThT) fluorescence intensity of specified A $\beta$  variants after 48 hours of aggregation. Both S8DA $\beta$  and pS8A $\beta$  demonstrate higher propensity to form ThT-reactive aggregates than npA $\beta$ , in accord with time-dependent ThT data previously reported in <sup>1</sup>. ThT values are reported after subtraction of the control intensity, and error bars represent the standard deviation of triplicate experiments. **(b)** Electron micrograph of S8DA $\beta$  fibrillar aggregates. **(c)** Excess scattering intensity of the supernatant of aggregated A $\beta$  solutions following centrifugation (16,000 g, 20 minutes) of the 48-hours aggregated A $\beta$  samples. The larger values of the scattering intensity of S8DA $\beta$  and pS8A $\beta$  samples indicate their higher tendency than npA $\beta$  to form soluble assemblies.

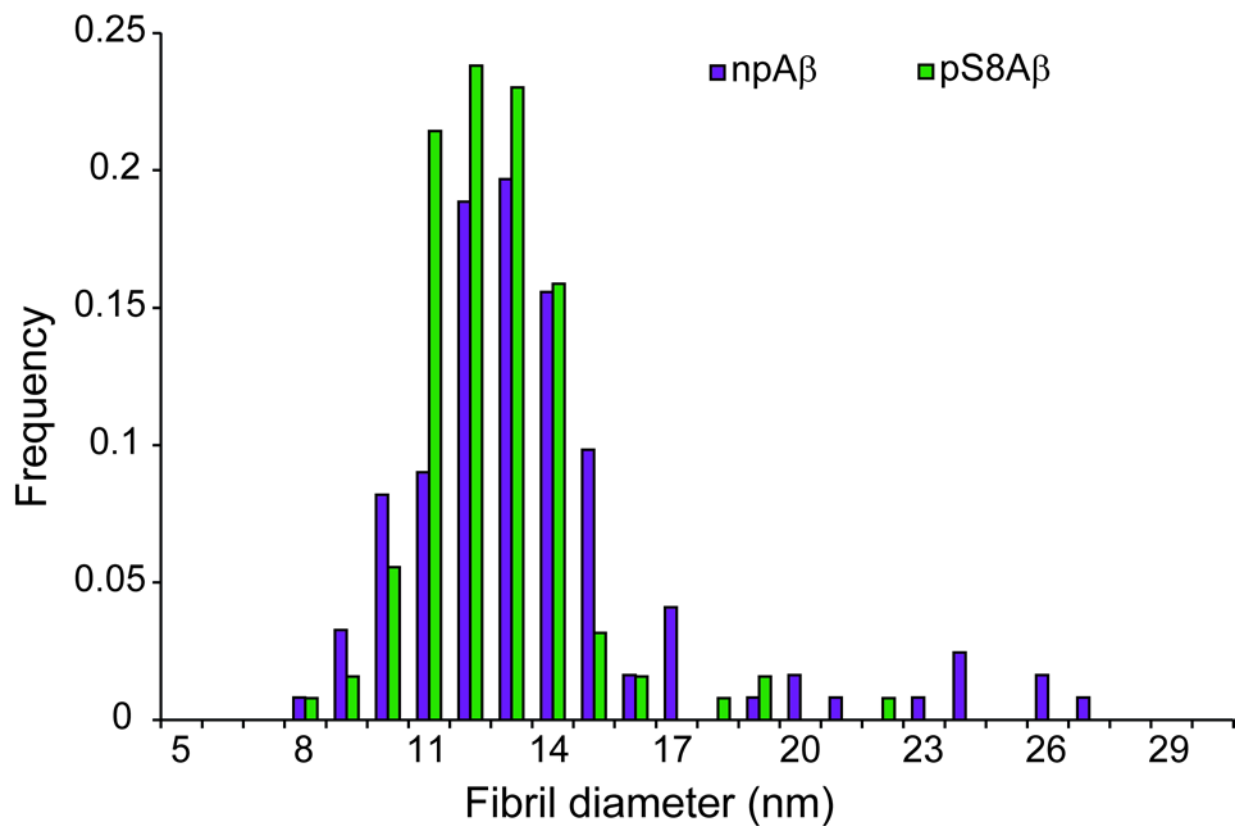

**Supplementary Figure 3.** Size distribution of npA $\beta$  and pS8A $\beta$  fibrils, obtained from measurement of more than 300 fibrils per peptide variant. Phosphorylation of A $\beta$  at serine 8 only slightly changed the diameter of A $\beta$  fibrils.

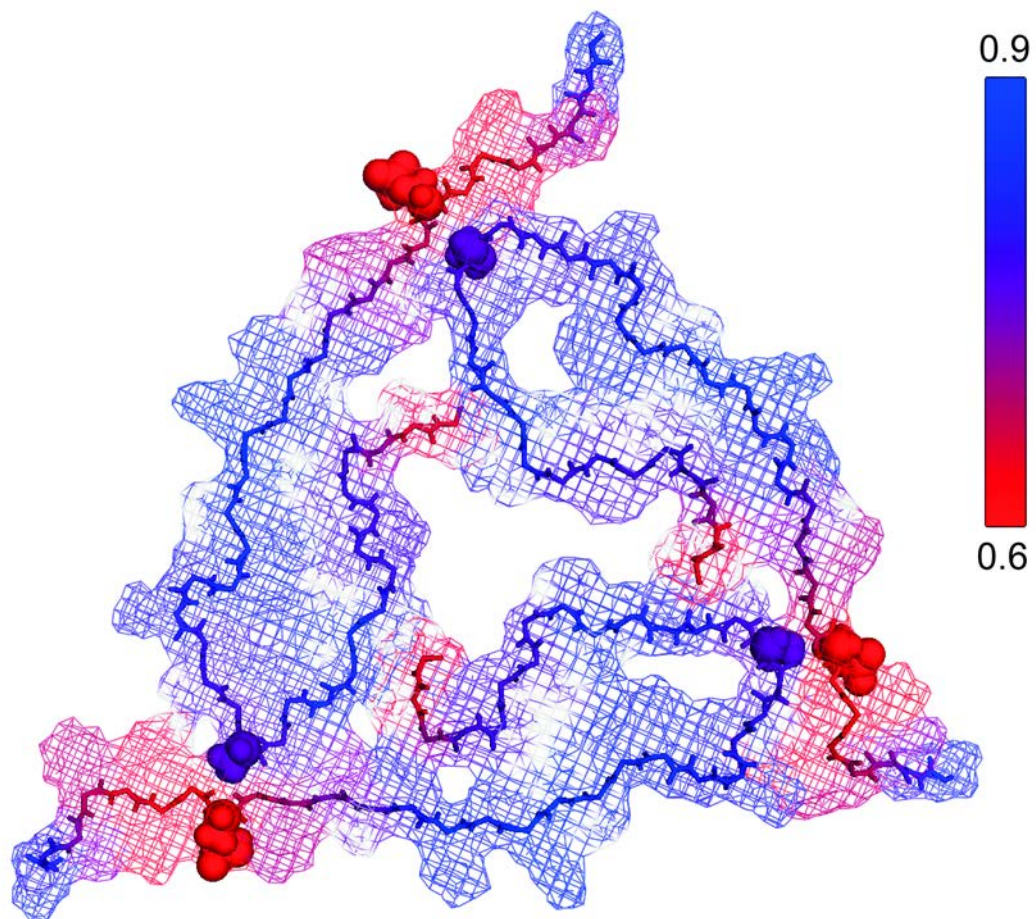

**Supplementary Figure 4.** The ratio of the backbone RMSF of pS8A $\beta$  to npA $\beta$  fibrils is mapped onto the three-dimensional structure of A $\beta$ 40 fibrils (average structure of MD trajectory). Regions shown in red (see color scale) are less mobile in A $\beta$ 40 fibrils phosphorylated at serine 8. The side chains of pS8 and S26 are displayed by spheres.

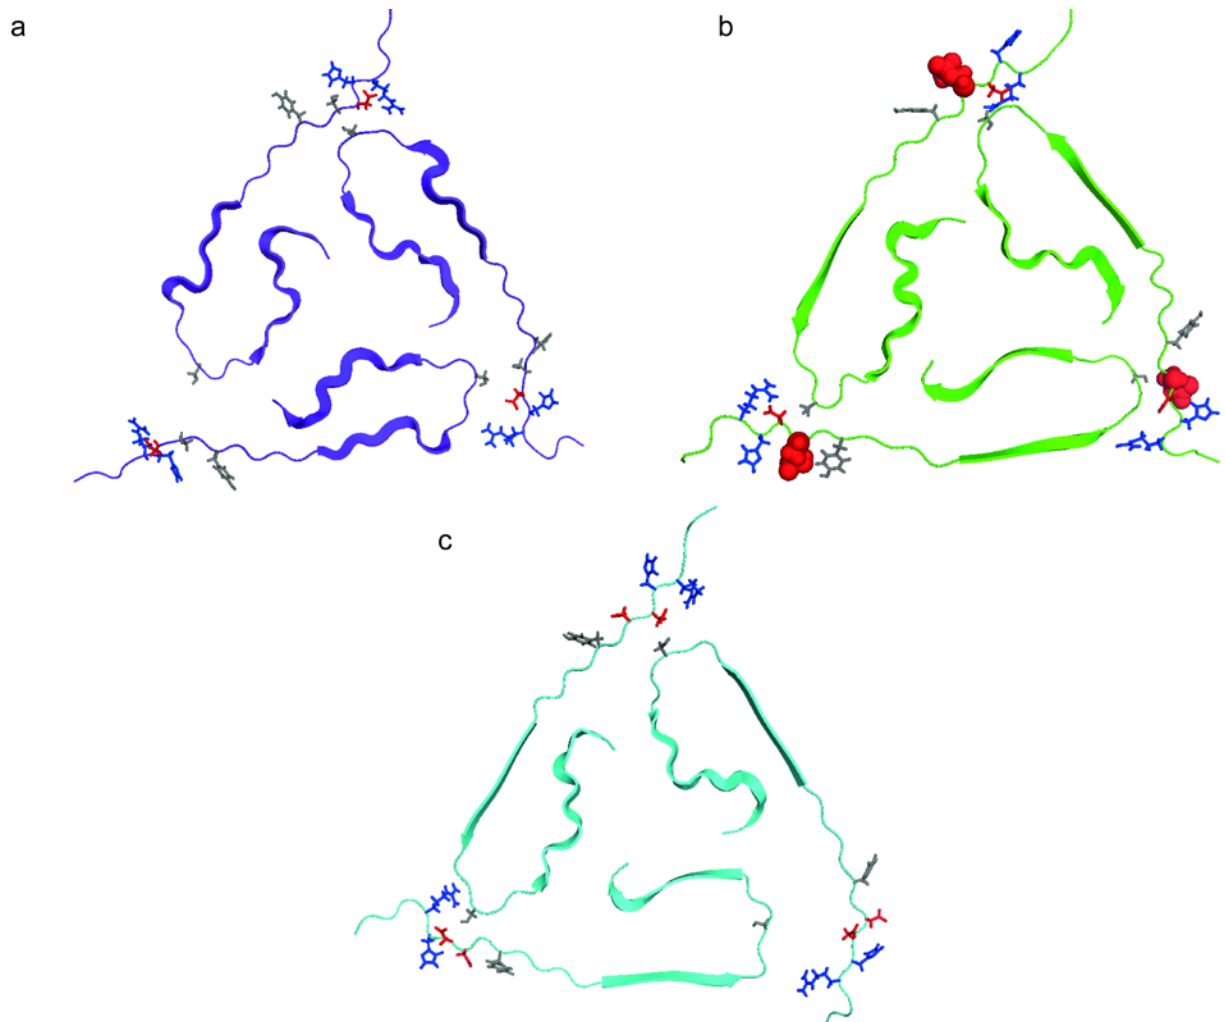

**Supplementary Figure 5.** MD average structure of npA $\beta$  (a), pS8A $\beta$  (b) and S8DA $\beta$  (c) fibrils. Residues R5, H6, D7, S8, D8, Y10 and S26 are color-coded on the basis of their side chain charge. The side chains of pS8 (b) are displayed by red spheres.

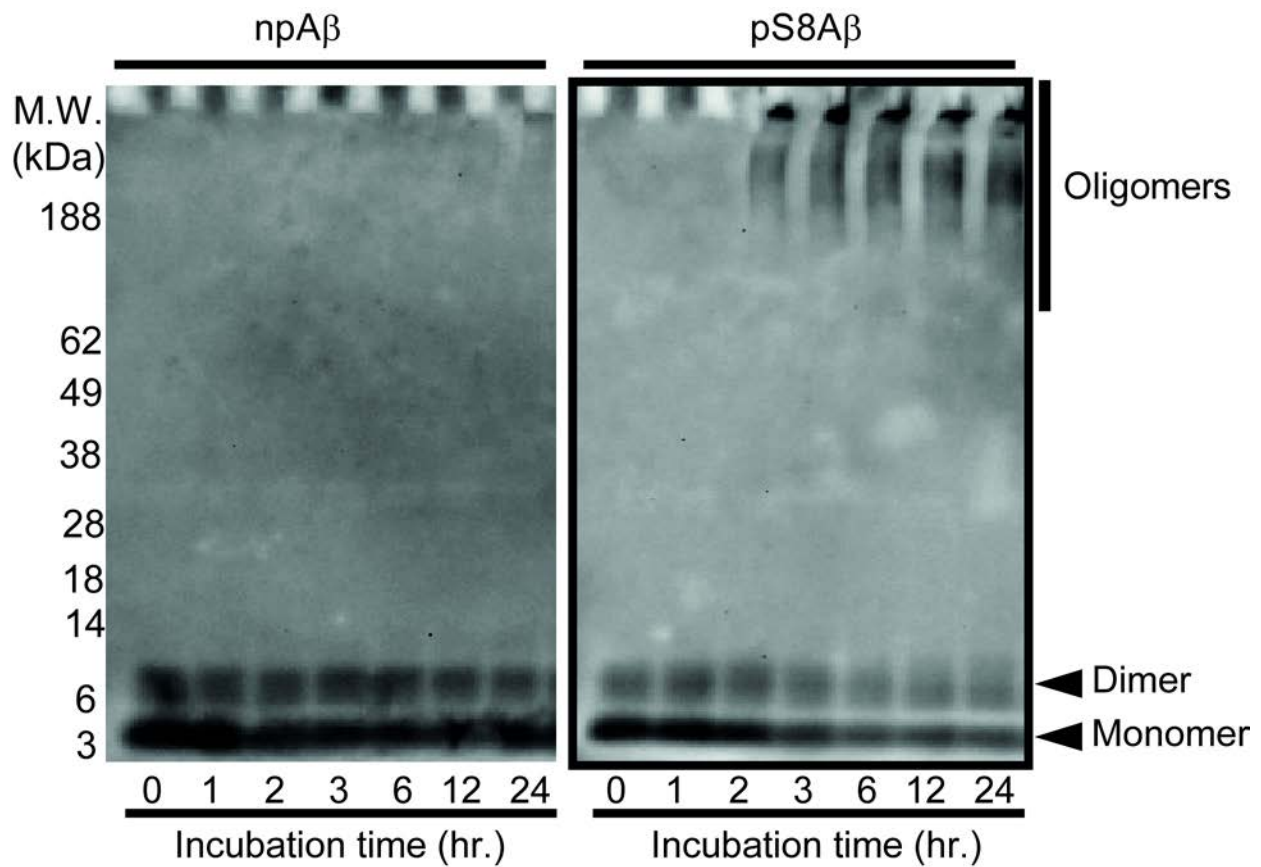

**Supplementary Figure 6.** Phosphorylation of A $\beta$  at serine 8 enhances the stability of A $\beta$  oligomers. npA $\beta$  and pS8A $\beta$  (50  $\mu$ M in 20 mM sodium phosphate buffer, pH 7.40, containing 50 mM NaCl) were incubated at 37  $^{\circ}$ C with gentle stirring. Aliquots of samples were collected at different time intervals, the whole aliquots were subjected to denaturing SDS-PAGE and A $\beta$  was detected by Western-blotting. The high-molecular weight oligomers of pS8A $\beta$  showed remarkable resistance against SDS-induced dissociation.

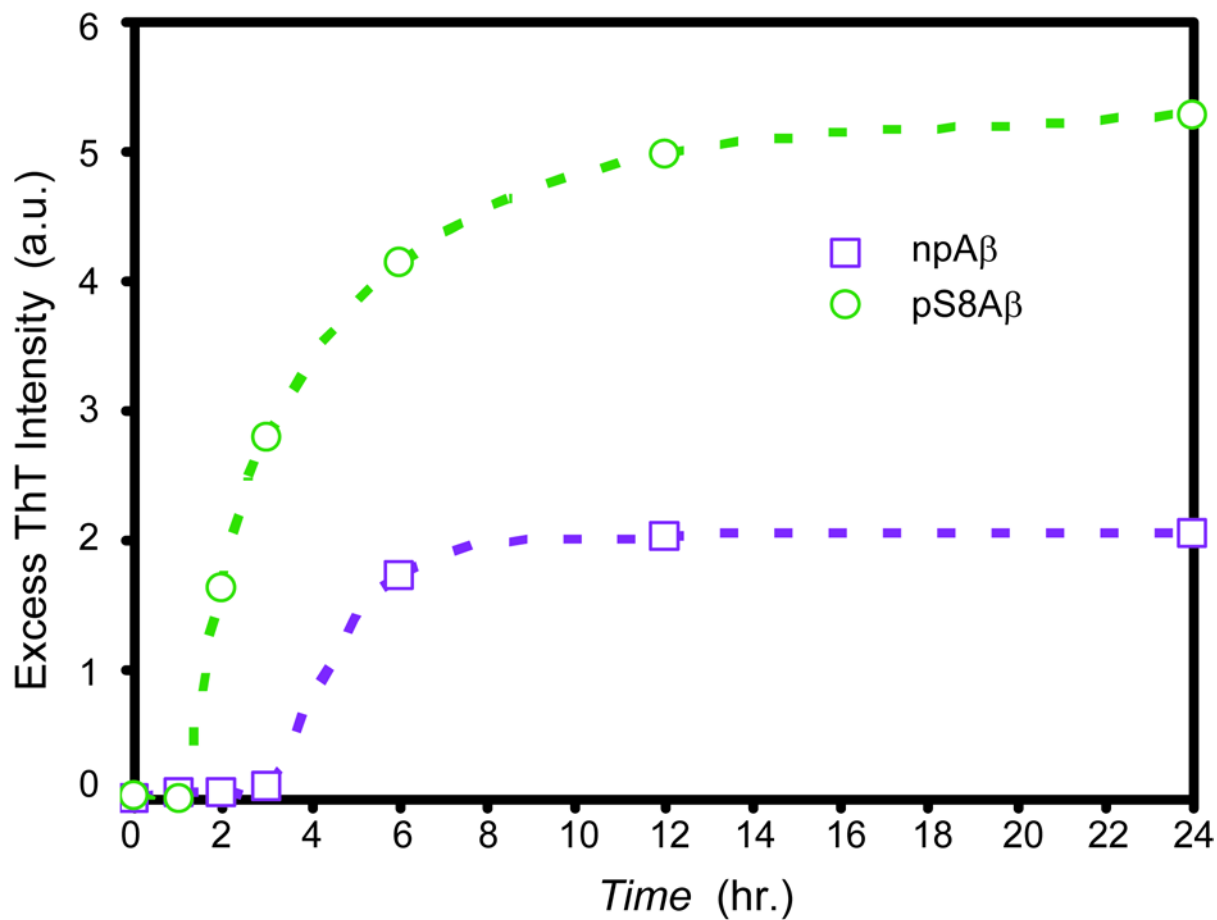

**Supplementary Figure 7.** Temporal evolution of ThT fluorescence intensity during aggregation of A $\beta$  samples used for denaturing SDS-PAGE experiments (shown in **Fig. 6** and **Supplementary Fig. 6**).

**Supplementary Table 1.** Fitting parameters obtained from the analysis of A $\beta$  monomer release from aggregates at high hydrostatic pressure (2000 bar).

|                               | npA $\beta$      | S8DA $\beta$    | pS8A $\beta$    | A $\beta$ 42    |
|-------------------------------|------------------|-----------------|-----------------|-----------------|
| <b>mono-exponential fit</b>   |                  |                 |                 |                 |
| $I_{\infty}$                  | 0.62 $\pm$ 0.00* | 0.55 $\pm$ 0.00 | 0.43 $\pm$ 0.00 | 0.33 $\pm$ 0.00 |
| -A                            | 0.35 $\pm$ 0.01  | 0.37 $\pm$ 0.01 | 0.21 $\pm$ 0.00 | 0.20 $\pm$ 0.00 |
| $R$ ( $10^{-4}$ s $^{-1}$ )   | 0.79 $\pm$ 0.04  | 0.74 $\pm$ 0.03 | 0.73 $\pm$ 0.04 | 0.30 $\pm$ 0.02 |
| SSE**                         | 0.002993         | 0.0027          | 0.001137        | 0.0006878       |
| Adjusted $R$ -square          | 0.9879           | 0.9906          | 0.9883          | 0.9945          |
| <b>bi-exponential fit</b>     |                  |                 |                 |                 |
| $I_{\infty}$                  | 0.66 $\pm$ 0.01  | 0.59 $\pm$ 0.01 | 0.45 $\pm$ 0.00 | 0.37 $\pm$ 0.00 |
| -A $_1$                       | 0.21 $\pm$ 0.01  | 0.23 $\pm$ 0.01 | 0.16 $\pm$ 0.01 | 0.21 $\pm$ 0.00 |
| $R_1$ ( $10^{-4}$ s $^{-1}$ ) | 0.33 $\pm$ 0.04  | 0.32 $\pm$ 0.05 | 0.44 $\pm$ 0.04 | 0.18 $\pm$ 0.01 |
| -A $_2$                       | 0.24 $\pm$ 0.01  | 0.24 $\pm$ 0.02 | 0.12 $\pm$ 0.01 | 0.05 $\pm$ 0.00 |
| $R_2$ ( $10^{-4}$ s $^{-1}$ ) | 2.21 $\pm$ 0.19  | 1.91 $\pm$ 0.20 | 2.99 $\pm$ 0.50 | 2.13 $\pm$ 0.18 |
| SSE**                         | 0.0002066        | 0.0002642       | 0.0002099       | 0.0000337       |
| Adjusted $R$ -square          | 0.9991           | 0.9990          | 0.9977          | 0.9997          |
| $F$ -statistic***             | 202.3            | 138.3           | 68.5            | 378.5           |
| $P$ -value                    | <0.0001          | <0.0001         | <0.0001         | <0.0001         |

\*. Errors in the fitting parameters were derived from covariance matrices.

\*\*..SSE: Sum of Squares due to error.

\*\*\*.  $F$ -statistic, computed between mono- and bi-exponential fits.



**Supplementary Table 2.** Fitting parameters obtained from the analysis of pressure-induced A $\beta$  monomer release data (2000 bar) according to two physical models.

|                                              | <b>npA<math>\beta</math></b> | <b>S8DA<math>\beta</math></b> | <b>pS8A<math>\beta</math></b> | <b>A<math>\beta</math>42</b> |
|----------------------------------------------|------------------------------|-------------------------------|-------------------------------|------------------------------|
| <b>Model 1*</b>                              |                              |                               |                               |                              |
| $k_{\text{off}} (10^{-4} \text{ s}^{-1})$    | 0.49 $\pm$ 0.02**            | 0.41 $\pm$ 0.02               | 0.32 $\pm$ 0.01               | 0.10 $\pm$ 0.00              |
| $k_{\text{on,app}} (10^{-4} \text{ s}^{-1})$ | 0.30 $\pm$ 0.02              | 0.33 $\pm$ 0.02               | 0.42 $\pm$ 0.02               | 0.20 $\pm$ 0.01              |
| SSE**                                        | 0.002993                     | 0.002700                      | 0.001137                      | 0.000688                     |
| Adjusted <i>R-square</i>                     | 0.9879                       | 0.9906                        | 0.9883                        | 0.9945                       |
| <b>Model 2*</b>                              |                              |                               |                               |                              |
| $k_1 (10^{-4} \text{ s}^{-1})$               | 0.30 $\pm$ 0.05              | 0.29 $\pm$ 0.06               | 0.36 $\pm$ 0.10               | 0.15 $\pm$ 0.01              |
| $k_2 (10^{-4} \text{ s}^{-1})$               | 0.42 $\pm$ 0.07              | 0.45 $\pm$ 0.07               | 0.86 $\pm$ 0.14               | 0.02 $\pm$ 0.01              |
| $k_{\text{off}} (10^{-4} \text{ s}^{-1})$    | 1.37 $\pm$ 0.08              | 1.06 $\pm$ 0.07               | 0.72 $\pm$ 0.09               | 0.72 $\pm$ 0.06              |
| $k_{\text{on,app}} (10^{-4} \text{ s}^{-1})$ | 0.29 $\pm$ 0.03              | 0.28 $\pm$ 0.04               | 0.25 $\pm$ 0.06               | 1.05 $\pm$ 0.09              |
| SSE***                                       | 0.000210                     | 0.000266                      | 0.000242                      | 0.000037                     |
| Adjusted <i>R-square</i>                     | 0.9991                       | 0.9990                        | 0.9973                        | 0.9997                       |
| <i>F-statistic</i> ****                      | 128.16                       | 88.42                         | 36.96                         | 221.84                       |
| <i>P-value</i>                               | <0.0001                      | <0.0001                       | <0.0001                       | <0.0001                      |

\*. Please see Fig. 3 for description of models 1 and 2.

\*\*.. Errors in the fitting parameters were derived from covariance matrices.

\*\*\*. SSE: Sum of Squares due to error.

\*\*\*\*. *F-statistic*, computed between Models 1 and 2.

## **Supplementary Methods**

**Thioflavin T (ThT) dye binding assays.** 50  $\mu\text{M}$  solutions of npA $\beta$  and pS8A $\beta$  in 20 mM sodium phosphate buffer (pH 7.4, containing 50 mM NaCl) were incubated at 37 °C with gentle stirring. The ThT binding assay was performed by mixing 10  $\mu\text{L}$  aliquots with 400  $\mu\text{L}$  of 20  $\mu\text{M}$  ThT solutions followed by fluorescence measurements using a Cary Eclipse spectrophotometer (Varian, Australia). ThT fluorescence emission intensities were measured at 482 nm following excitation at 446 nm. All measurements were performed in triplicates.

## **Supplementary Reference**

1. Kumar S, *et al.* Extracellular phosphorylation of the amyloid beta-peptide promotes formation of toxic aggregates during the pathogenesis of Alzheimer's disease. *EMBO J.* **30**, 2255-2265 (2011).
